# Supplementary material
Source: Royal Society of Chemistry journal article supplement (doi:10.1039/d6ta00258g)
Supplement: d6ta00258g1.pdf [file d6ta00258g1.pdf]

**Supporting Information for:**

**Influence of Al doping ratio on properties of ZnO:Al passivating contacts  
for crystalline silicon solar cells**

*Piyumi Kodithuwakku, Christian Samundsett, Daniel H. Macdonald, Lachlan E. Black\**

School of Engineering, The Australian National University, Canberra, ACT 2600, Australia

\*E-mail: [Lachlan.black@anu.edu.au](mailto:Lachlan.black@anu.edu.au)

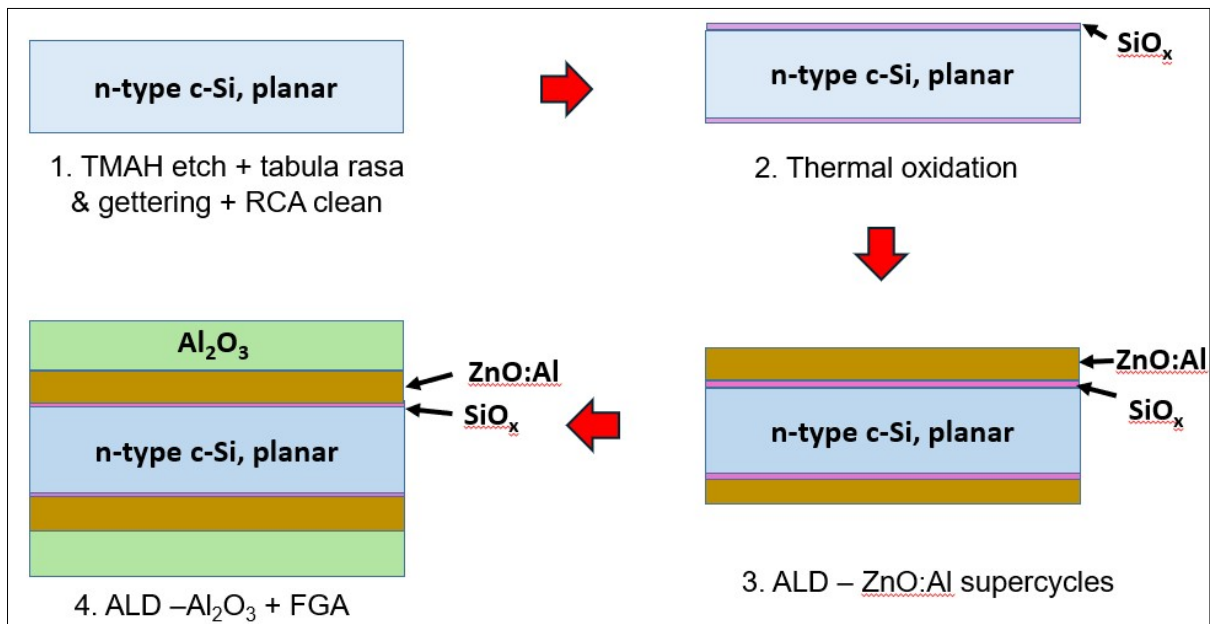

**Figure S1:** Schematic diagram of the fabrication process of a sample symmetrically passivated with a  $\text{SiO}_x/\text{ZnO:Al}/\text{Al}_2\text{O}_3$  stack for the lifetime measurements.

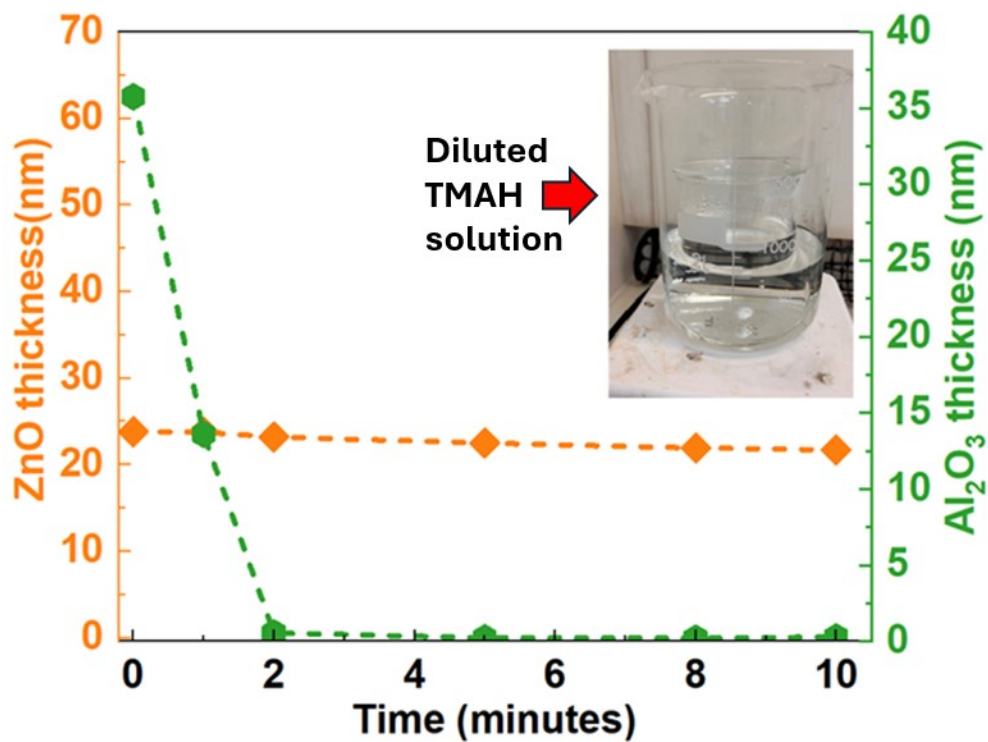

**Figure S2:** Thickness versus etching time of ZnO and Al<sub>2</sub>O<sub>3</sub> in diluted TMAH solution at 60 °C.

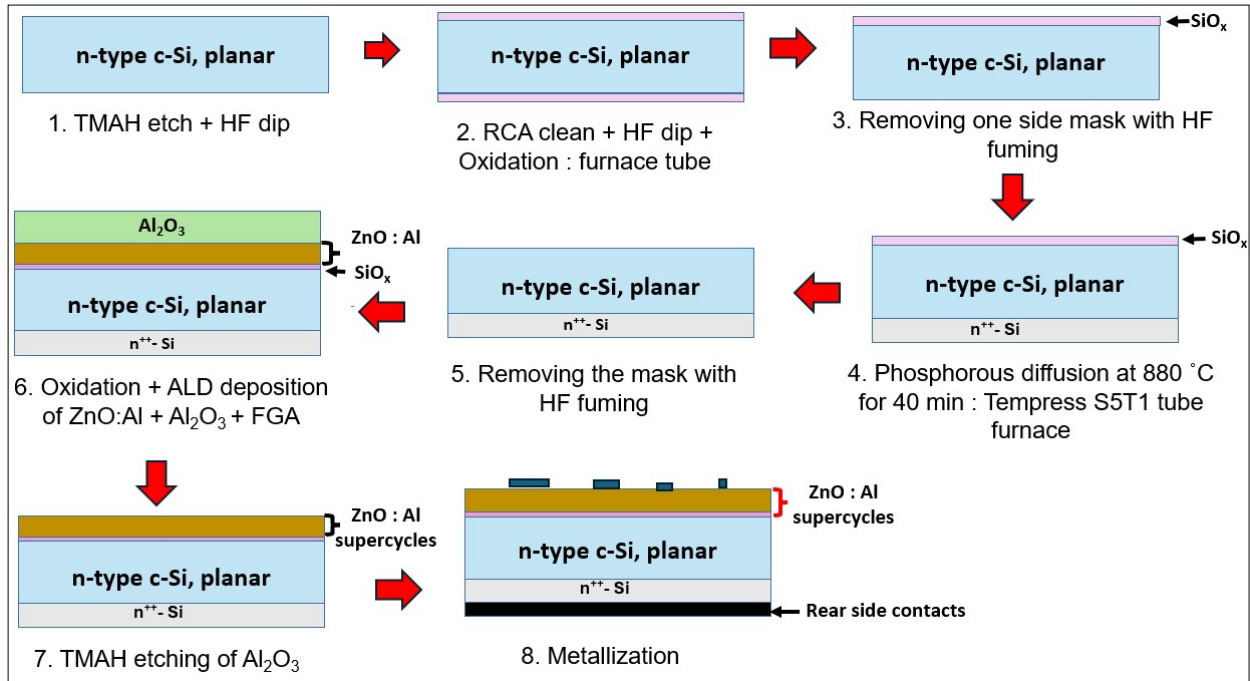

**Figure S3:** Schematic diagram of the fabrication process of the SiO<sub>x</sub>/ZnO:Al stack on the front side of rear-side-diffused substrates for the contact resistivity measurements. After the etching of the Al<sub>2</sub>O<sub>3</sub> capping layer, metal electrodes were evaporated using thermal evaporation through a shadow mask to form a Cox–Strack pattern (which consists of circles with diameters of 0.1, 0.15, 0.2, 0.25, 0.3, 0.35, 0.4, 0.5, 0.6 and 0.7 mm).

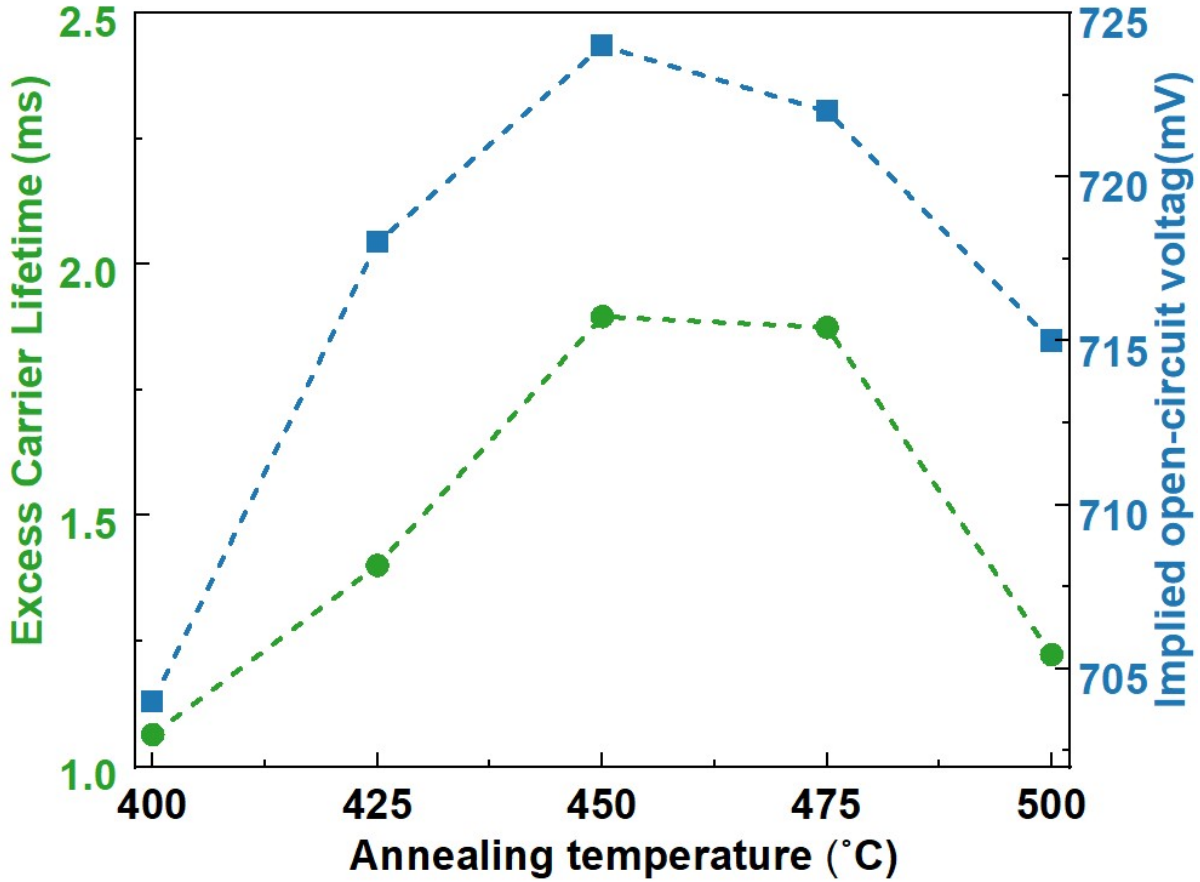

**Figure S4:** Implied  $V_{oc}$  and lifetime of c-Si wafers with symmetrical  $\text{SiO}_x/\text{ZnO}/\text{Al}_2\text{O}_3$  stacks as a function of the varying anneal temperature.

**Table S1:** Electrical properties of the as-deposited ZnO and ZnO:Al (~50 nm thickness and Zn:Al cycle ratio of 15:1) extracted from Hall-effect measurements.

| Sample                | Carrier concentration ( $10^{19} \text{ cm}^{-3}$ ) | Mobility ( $\text{cm}^2/\text{V s}$ ) | Resistivity ( $10^{-3} \Omega \text{ cm}$ ) |
|-----------------------|-----------------------------------------------------|---------------------------------------|---------------------------------------------|
| ZnO as-dep.           | 3.05                                                | 13.50                                 | 15.16                                       |
| ZnO:Al (15:1) as-dep. | 12.3                                                | 5.02                                  | 5.07                                        |

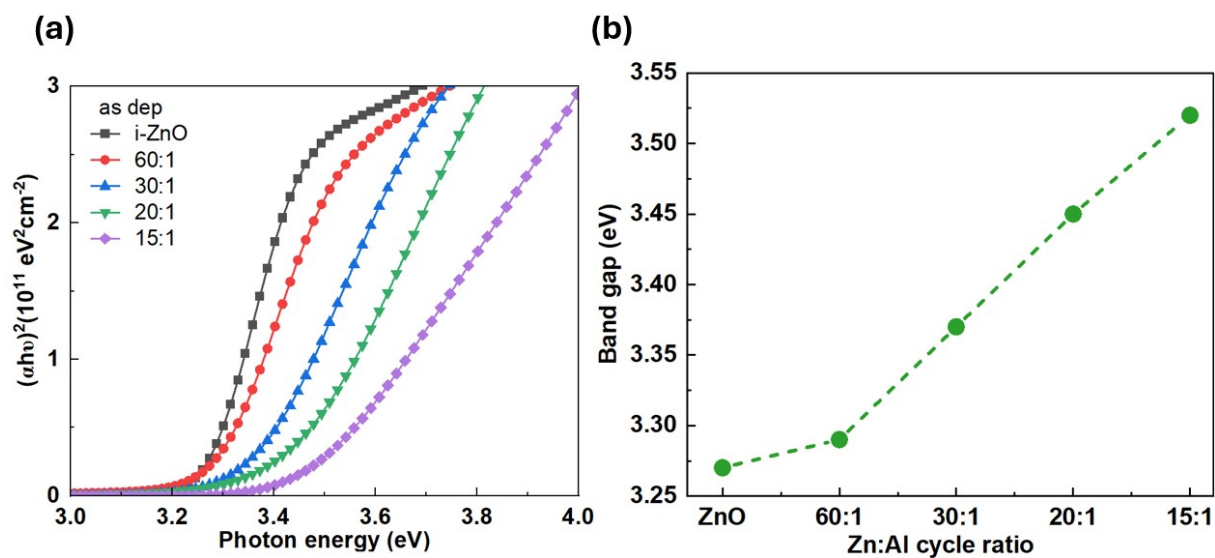

**Figure S5:** (a) Optical band gap extraction via Tauc plot and (b) resulting optical band gap of as-deposited intrinsic ZnO and ZnO:Al films with varying Zn:Al cycle ratio.

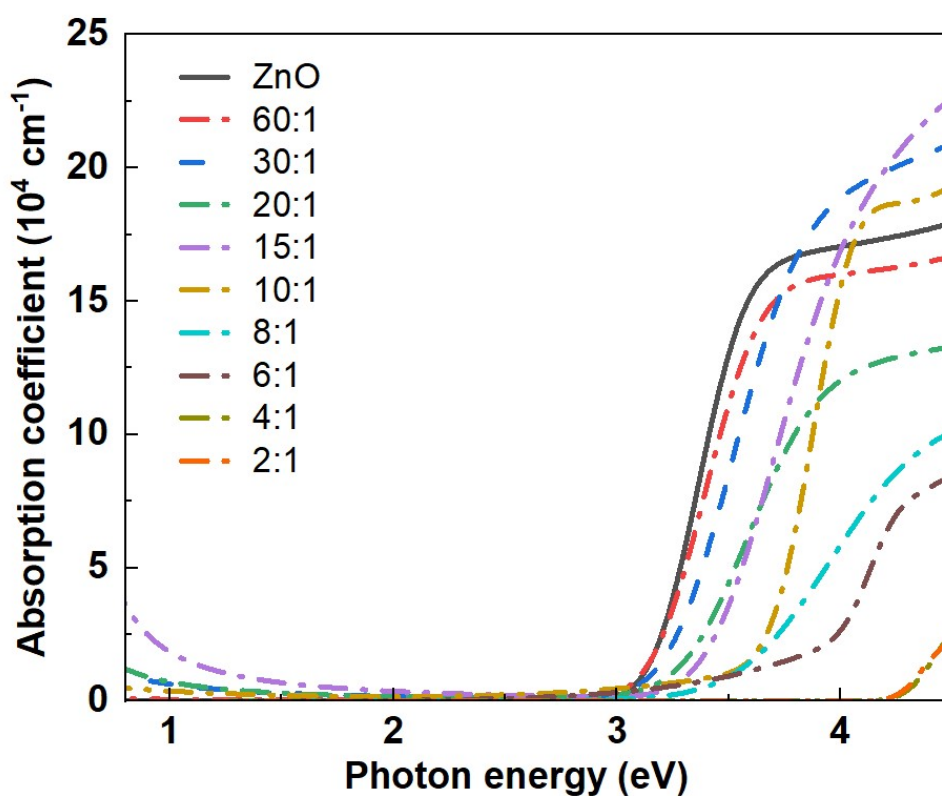

**Figure S6:** Absorption coefficient of ZnO:Al films with varying Zn:Al cycle ratio after Al<sub>2</sub>O<sub>3</sub> capping and annealing.

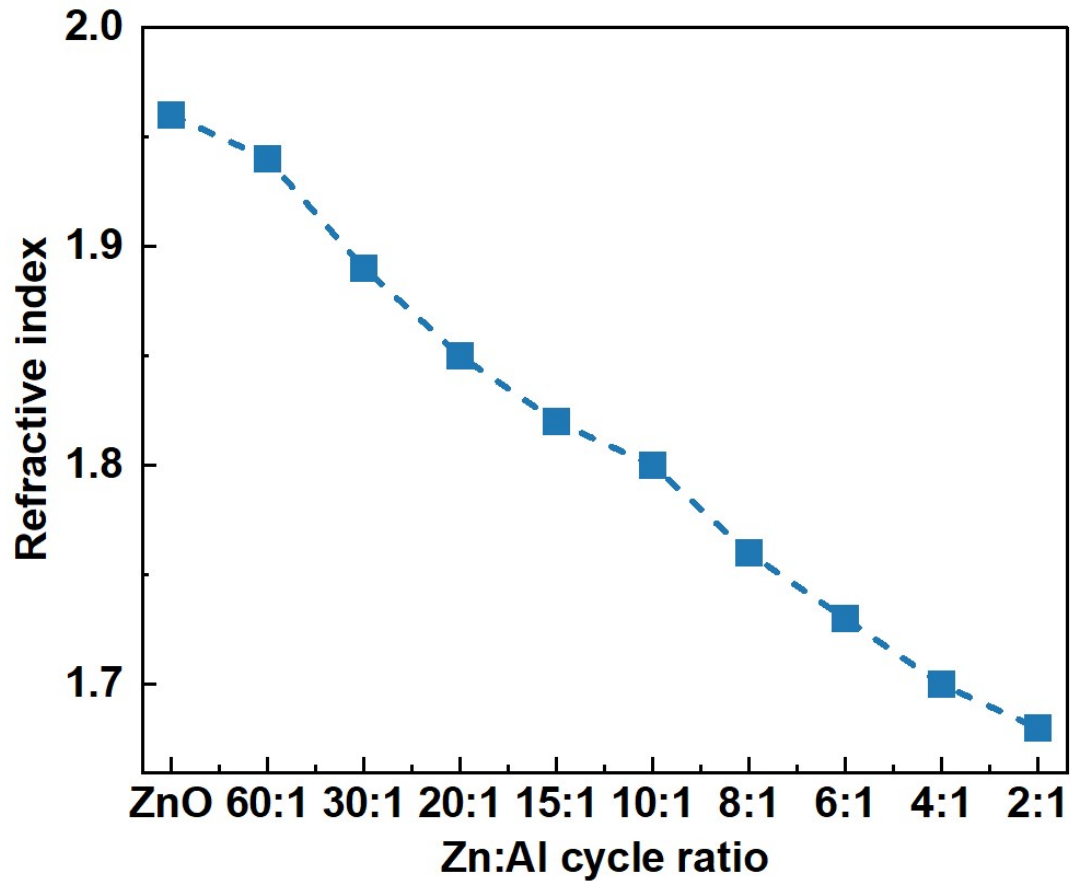

**Figure S7:** The refractive index of ZnO and ZnO:Al films with varying Zn:Al cycle ratio after Al<sub>2</sub>O<sub>3</sub> capping and annealing.

**Table S2:** Crystallite size of SiO<sub>x</sub>/ZnO:Al films without annealing, as assessed by XRD.

| Sample | Crystallite size (nm) |
|--------|-----------------------|
| ZnO    | 12.89                 |
| 60:1   | 13.00                 |
| 30:1   | 14.13                 |
| 20:1   | 14.45                 |
| 15:1   | 13.65                 |

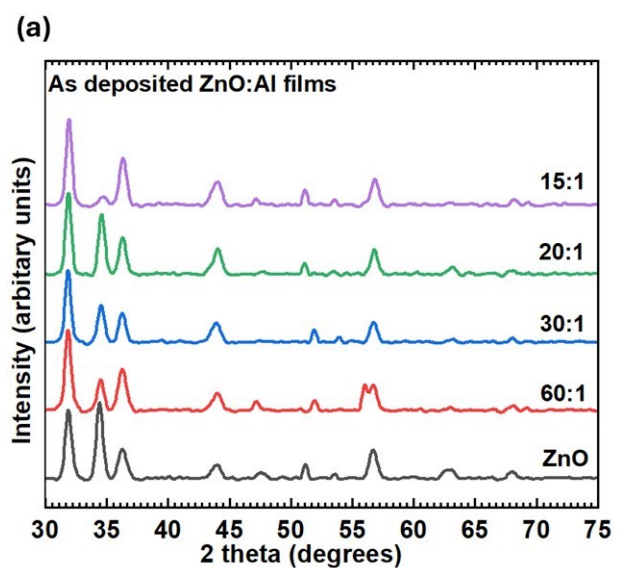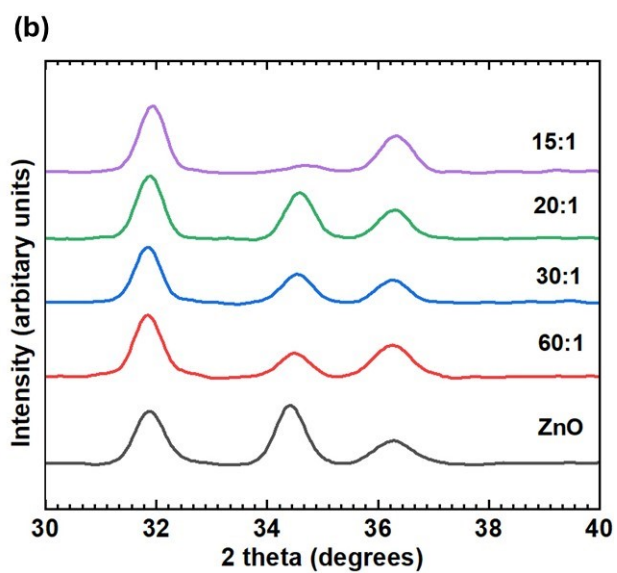

**Figure S8:** XRD spectra for as-deposited ZnO and ZnO:Al films with different Zn:Al cycle ratios **(a)** from 30° to 75° and **(b)** from 30° to 40°

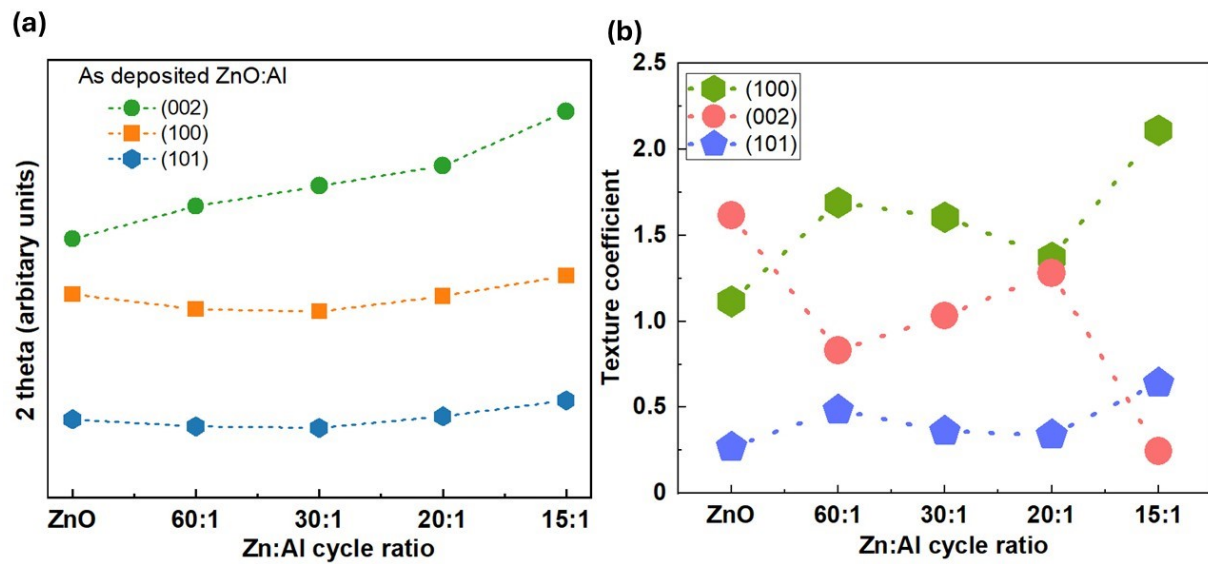

**Figure S9:** (a) 2 theta angles and (b) texture coefficients for the (100), (002) and (101) diffraction peaks of the as-deposited ZnO and ZnO:Al films with varying Zn:Al cycle ratio.

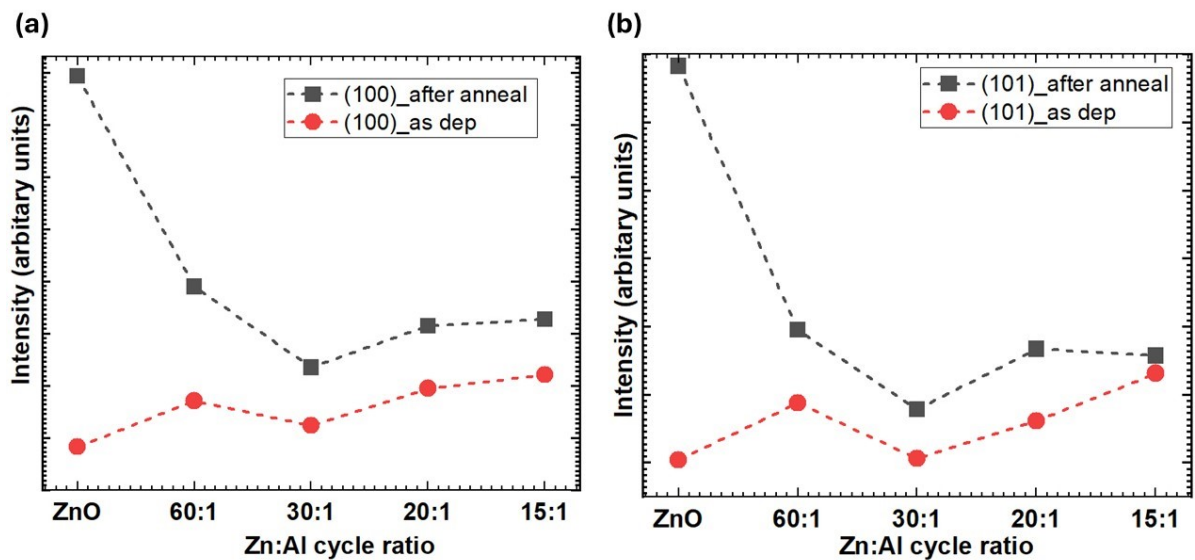

**Figure S10:** XRD **(a)** (100) peak intensity and **(b)** (101) peak intensity changes with varying Zn: Al cycle ratio, before and after annealing.
